# Supplementary material
Source: PubMed Central journal article supplement (PMC6053686)
Supplement: NIHMS969017-supplement-Appendix.pdf [file NIHMS969017-supplement-Appendix.pdf]

# Supplemental Material

## Appendix.

### Investigators:

Marie Bretagne.<sup>1</sup>, Pauline Dureau.<sup>1</sup>, Valentin Saqué.<sup>1</sup>, Aida Zarhrate-ghoul.<sup>1</sup>, Clément Bourguignon.<sup>2</sup>, Monique Leban.<sup>3</sup>, Virginie Grouthier.<sup>3</sup>, Martino Vaglio.<sup>4</sup>

<sup>1</sup> AP-HP, Pitié-Salpêtrière Hospital, Department of Pharmacology, CIC-1421, Sorbonne Université, Faculty of Medicine, F-75013 Paris, France.

<sup>2</sup> AP-HP, Pitié-Salpêtrière Hospital, Department of Cardiology, Arrhythmology unit, F-75013 Paris, France.

<sup>3</sup> AP-HP, Pitié-Salpêtrière Hospital, IE3M, Department of Endocrinology and Reproductive Medicine, and Centre de Référence des Maladies Endocriniennes Rares de la croissance et Centre des Pathologies gynécologiques Rares, F-75013 Paris, France.

<sup>4</sup> AMPS-LLC, New-York, NY, USA.
